# Supplementary material for: Metformin attenuates the onset of non-alcoholic fatty liver disease and affects intestinal microbiota and barrier in small intestine
Source: PubMed Central journal article supplement (PMC6491483; doi:10.1038/s41598-019-43228-0), 2019-04-30
Supplement: 41598_2019_43228_MOESM1_ESM.pdf [file 41598_2019_43228_MOESM1_ESM.pdf]

## **Metformin attenuates the onset of non-alcoholic fatty liver disease and affects intestinal microbiota and barrier in small intestine**

Annette Brandt<sup>1</sup>, Angélica Hernández-Arriaga<sup>2</sup>, Richard Kehm<sup>3,4</sup>, Victor Sánchez<sup>1</sup>, Cheng Jun Jin<sup>3</sup>, Anika Nier<sup>1</sup>, Anja Baumann<sup>1</sup>, Amélia Camarinha-Silva<sup>2</sup>, Ina Bergheim<sup>1,\*</sup>

*<sup>1</sup>Department of Nutritional Sciences, R.F. Molecular Nutritional Science, University of Vienna, 1090, Vienna, Austria*

*<sup>2</sup>Institute of Animal Science, University of Hohenheim, 70599, Stuttgart, Germany*

*<sup>3</sup>Institute of Nutrition, SD Model Systems of Molecular Nutrition, Friedrich-Schiller-University Jena, 07743 Jena, Germany*

*<sup>4</sup>Department of Molecular Toxicology, German Institute of Human Nutrition Potsdam-Rehbruecke (DIfE), 14558 Nuthetal, Germany*

*\*corresponding author*

**Supplementary Table S1. Effect of a chronic (6 weeks) and short-term feeding (4 days) of a FFC or control diet ± metformin on markers of inflammation and gluconeogenesis in liver tissue.**

|                     | groups  |                      |          |                         | P-value |    |       |
|---------------------|---------|----------------------|----------|-------------------------|---------|----|-------|
|                     | C       | FFC                  | C+Met    | FFC+Met                 | DExME   | ME | DE    |
| <b>6 weeks</b>      |         |                      |          |                         |         |    |       |
| <i>Il10</i> mRNA    | 100±5.6 | 114±7.7              | 79.5±8.1 | 158±12 <sup>a,b,c</sup> | <0.05   | NS | <0.05 |
| <i>Clec10a</i> mRNA | 100±12  | 80.5±18              | 101±23   | 85.9±15                 | NS      | NS | NS    |
| <i>Pepck</i> mRNA   | 100±18  | 80.9±26              | 95.2±16  | 86.2±23                 | NS      | NS | NS    |
| <b>4 days</b>       |         |                      |          |                         |         |    |       |
| <i>Il10</i> mRNA    | 100±14  | 140±12               | 132±34   | 116±23                  | NS      | NS | NS    |
| <i>Clec10a</i> mRNA | 100±18  | 92.0±6.5             | 138±32   | 108±15                  | NS      | NS | NS    |
| <i>Pepck</i> mRNA   | 100±31  | 50.4±10 <sup>c</sup> | 118±20   | 31.3±4.8 <sup>c</sup>   | NS      | NS | <0.05 |

Values are means ± standard error of means and are shown as % of control; n=4-8. C: control diet, *Clec10a*: C-type lectin domain family 10 member A, C+Met: control diet and oral treatment with metformin (300 mg/kg BW/day), DE: diet effect, DExME: interaction between diet and metformin, FFC: fat-, fructose- and cholesterol-rich diet, FFC+Met: fat-, fructose- and cholesterol-rich diet and oral treatment with metformin (300 mg/kg BW/day). ME: metformin effect, Met: metformin, NS: not significant, *Il10*: interleukin 10, *Pepck*: phosphoenolpyruvate carboxykinase. <sup>a</sup>*P*<0.05 compared with mice fed a control diet; <sup>b</sup>*P*<0.05 compared with mice fed a FFC diet; <sup>c</sup>*P*<0.05 compared with mice fed a control diet treated with metformin.

**Supplementary Table S2. Nutrient composition of control diet and fat-, fructose- and cholesterol-rich diet (FFC).**

|                                                |         | <b>Control</b> | <b>FFC</b> |
|------------------------------------------------|---------|----------------|------------|
| <b>Crude protein (CP)</b>                      | % wt/wt | 17.4           | 16.0       |
| <b>Crude lipid (CL)</b>                        | % wt/wt | 5.1            | 11.8       |
| <b>Crude fibre</b>                             | % wt/wt | 5.0            | 2.0        |
| <b>Crude ash</b>                               | % wt/wt | 4.1            | 4.2        |
| <b>Corn Starch</b>                             | % wt/wt | 34.6           | 5.0        |
| <b>Sucrose</b>                                 | % wt/wt | 11.0           | -          |
| <b>Glucose</b>                                 | % wt/wt | -              | 5.0        |
| <b>Fructose</b>                                | % wt/wt | -              | 50.0       |
| <b>Cholesterol</b>                             | % wt/wt | -              | 0.16       |
| <b>L-Lysine</b>                                | % wt/wt | 1.43           | 1.32       |
| <b>L-Methionine + L-Cystein</b>                | % wt/wt | 1.00           | 0.96       |
| <b>L-Threonine</b>                             | % wt/wt | 0.75           | 0.69       |
| <b>Calcium</b>                                 | % wt/wt | 0.78           | 0.77       |
| <b>Phosphorus</b>                              | % wt/wt | 0.48           | 0.47       |
| <b>Sodium</b>                                  | % wt/wt | 0.23           | 0.30       |
| <b>Vitamin A (retinol acetate)</b>             | IU/kg   | 15000          | 15000      |
| <b>Vitamin D<sub>3</sub> (cholecalciferol)</b> | IU/kg   | 1500           | 1500       |
| <b>Vitamin E (α-tocopherol acetate)</b>        | mg/kg   | 150            | 150        |
| <b>Fatty acids</b>                             |         |                |            |
| <b>C4:0</b>                                    | % wt/wt | -              | 0.44       |
| <b>C6:0</b>                                    | % wt/wt | -              | 0.29       |
| <b>C8:0</b>                                    | % wt/wt | -              | 0.16       |
| <b>C10:0</b>                                   | % wt/wt | -              | 0.35       |
| <b>C12:0</b>                                   | % wt/wt | -              | 0.40       |
| <b>C14:0</b>                                   | % wt/wt | 0.02           | 1.23       |
| <b>C16:0</b>                                   | % wt/wt | 0.57           | 3.10       |
| <b>C18:0</b>                                   | % wt/wt | 0.18           | 1.14       |
| <b>C18:1 (n-9)</b>                             | % wt/wt | 1.28           | 2.58       |
| <b>C18:2 (n-6)</b>                             | % wt/wt | 2.65           | 0.21       |
| <b>C18:3 (n-3)</b>                             | % wt/wt | 0.29           | 0.06       |
| <b>Metabolizable energy</b>                    | kcal/kg | 3752           | 4254       |
| <b>CP</b>                                      | kcal%   | 19             | 15         |
| <b>CL</b>                                      | kcal%   | 12             | 25         |
| <b>Carbohydrate</b>                            | kcal%   | 69             | 60         |

CL: crude lipid, CP: crude protein

**Supplementary Table S3. Primer sequences.**

|                 | <b>Forward (5'-3')</b>        | <b>Reverse (5'-3')</b>        |
|-----------------|-------------------------------|-------------------------------|
| <b>18S</b>      | GTA ACC CGT TGA ACC CCA TT    | CCA TCC AAT CGG TAG TAG CG    |
| <b>Acc</b>      | CTT CCT CCT GAT CAG CAA CTC T | CGT GAG TTT TCC CAA AAT AAG C |
| <b>Acox1</b>    | GGG AAT TTG GCA TCG CAG AC    | CAT CTC CGT CTG GGC GTA GG    |
| <b>asma</b>     | CTG ACA GAG GCA CCA CTG AA    | CAT CTC CAG AGT CCA GCA CA    |
| <b>Clec10a</b>  | TGG TCG TCT CCG TGA TTG GA    | CCT GCA GTT CCT GCC TGT GA    |
| <b>Eef2</b>     | GTG ACA GCT GCC TTG CGT GT    | GAT GCG CTG GAA GGT CTG GT    |
| <b>Fasn</b>     | TCT GGG CCA ACC TCA TTG GT    | GAA GCT GGG GGT CCA TTG TG    |
| <b>Il10</b>     | CAG GGC CCT TTG CTA TGG TG    | CGG CTG GGG GAT GAC AGT AG    |
| <b>Il1b</b>     | TGG CTG TGG AGA AGC TGT GG    | GTC CGA CAG CAC GAG GCT TT    |
| <b>Mmp13</b>    | AGA AGT GTG ACC CAG CCC TA    | GCG CAA GAA GAA TCT GTC TTT   |
| <b>Occ</b>      | CAT CAG CCA TGT CCG TGA GG    | GGG GCG ACG TCC ATT TGT AG    |
| <b>Pepck</b>    | CCC TGG GAG ATG GGG AGT TC    | CCC ACC ATA TCC GCT TCC AA    |
| <b>Sreb1c</b>   | ACC GGC TAC TGC TGG ACT GC    | AGA GCA AGA GGG TGC CAT CG    |
| <b>Tlr4</b>     | AGC CAT TGC TGC CAA CAT CA    | GCT GCC TCA GCA GGG ACT TC    |
| <b>Vimentin</b> | GCC GCA GCC TCT ATT CCT CA    | CTC GAG GAA GAG CAC CTT GT    |
| <b>Zo1</b>      | GCA GAC TTC TGG AGG TTT CG    | CTT GCC AAC TTT TCT CTG GC    |

Acc: acetyl coA carboxylase, Acox1: acyl coA oxidase-1, asma:  $\alpha$ -smooth muscle actin, Clec10a: C-type lectin domain family 10 member A, Eef2: eukaryotic elongation factor 2, Fasn: fatty acid synthase, Il10: interleukin 10, Il1b: interleukin 1 $\beta$ , Mmp: matrix-metalloproteinase, Occ: occludin, Pepck: phosphoenolpyruvate carboxykinase, Sreb1c: sterol regulatory element-binding protein 1, Tlr: toll-like receptor, Zo1: zonula occludens-1

## 6 weeks

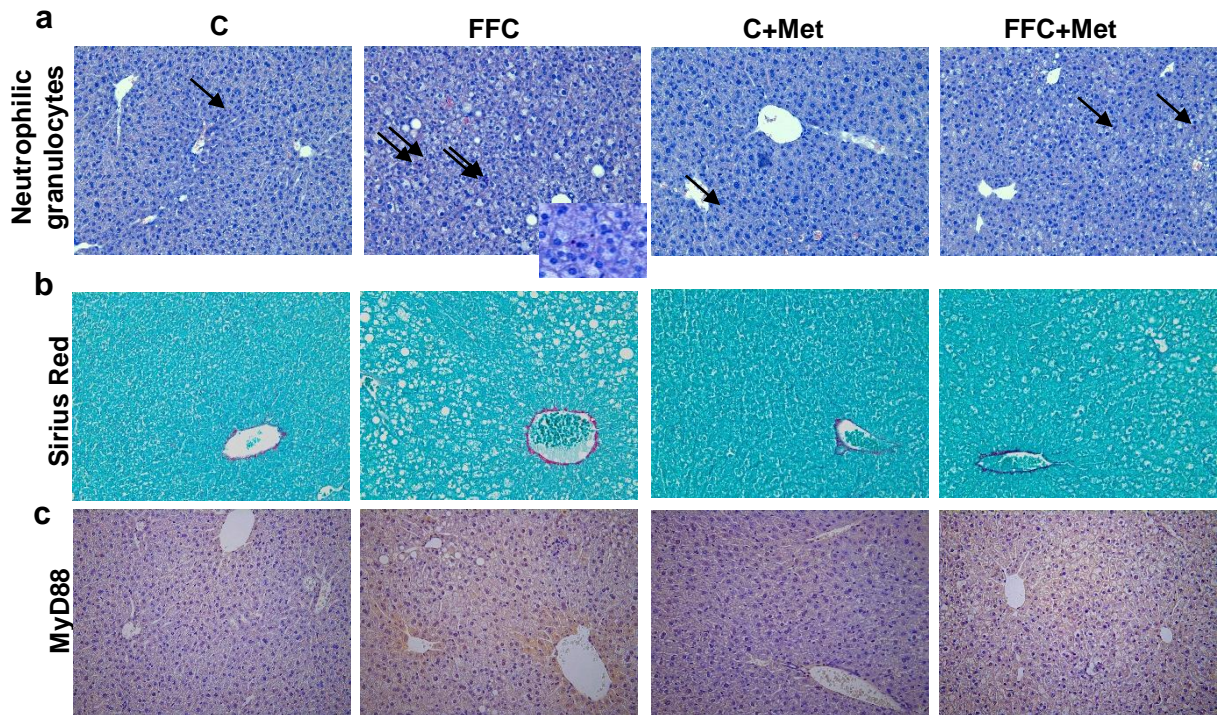

## 4 days

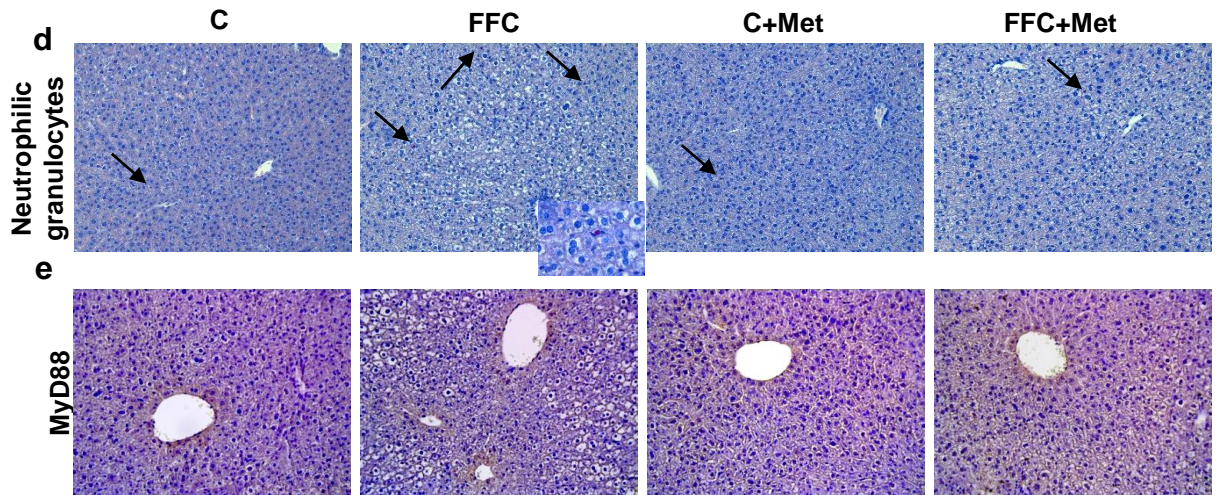

**Supplementary Figure S1: Representative pictures of neutrophilic granulocytes, Sirius Red staining and MyD88 protein staining in long-term feeding (6 weeks) and short-term feeding (4 days) of a FFC or control diet  $\pm$  metformin. (a,d) Neutrophilic granulocytes in liver sections (200x; arrows are indicators for neutrophilic granulocytes; insertion in FFC sections 630x), (b) Sirius red staining in liver section and (c, e) MyD88 in liver tissue (200x) in long-term feeding and short-term feeding. C: control diet; C+Met: control diet and oral treatment with metformin (300 mg/kg BW/day); FFC: fat-, fructose- and cholesterol-rich diet; FFC+Met: fat-, fructose- and cholesterol-rich diet and oral treatment with metformin (300 mg/kg BW/day); MyD88: myeloid differentiation primary response 88.**

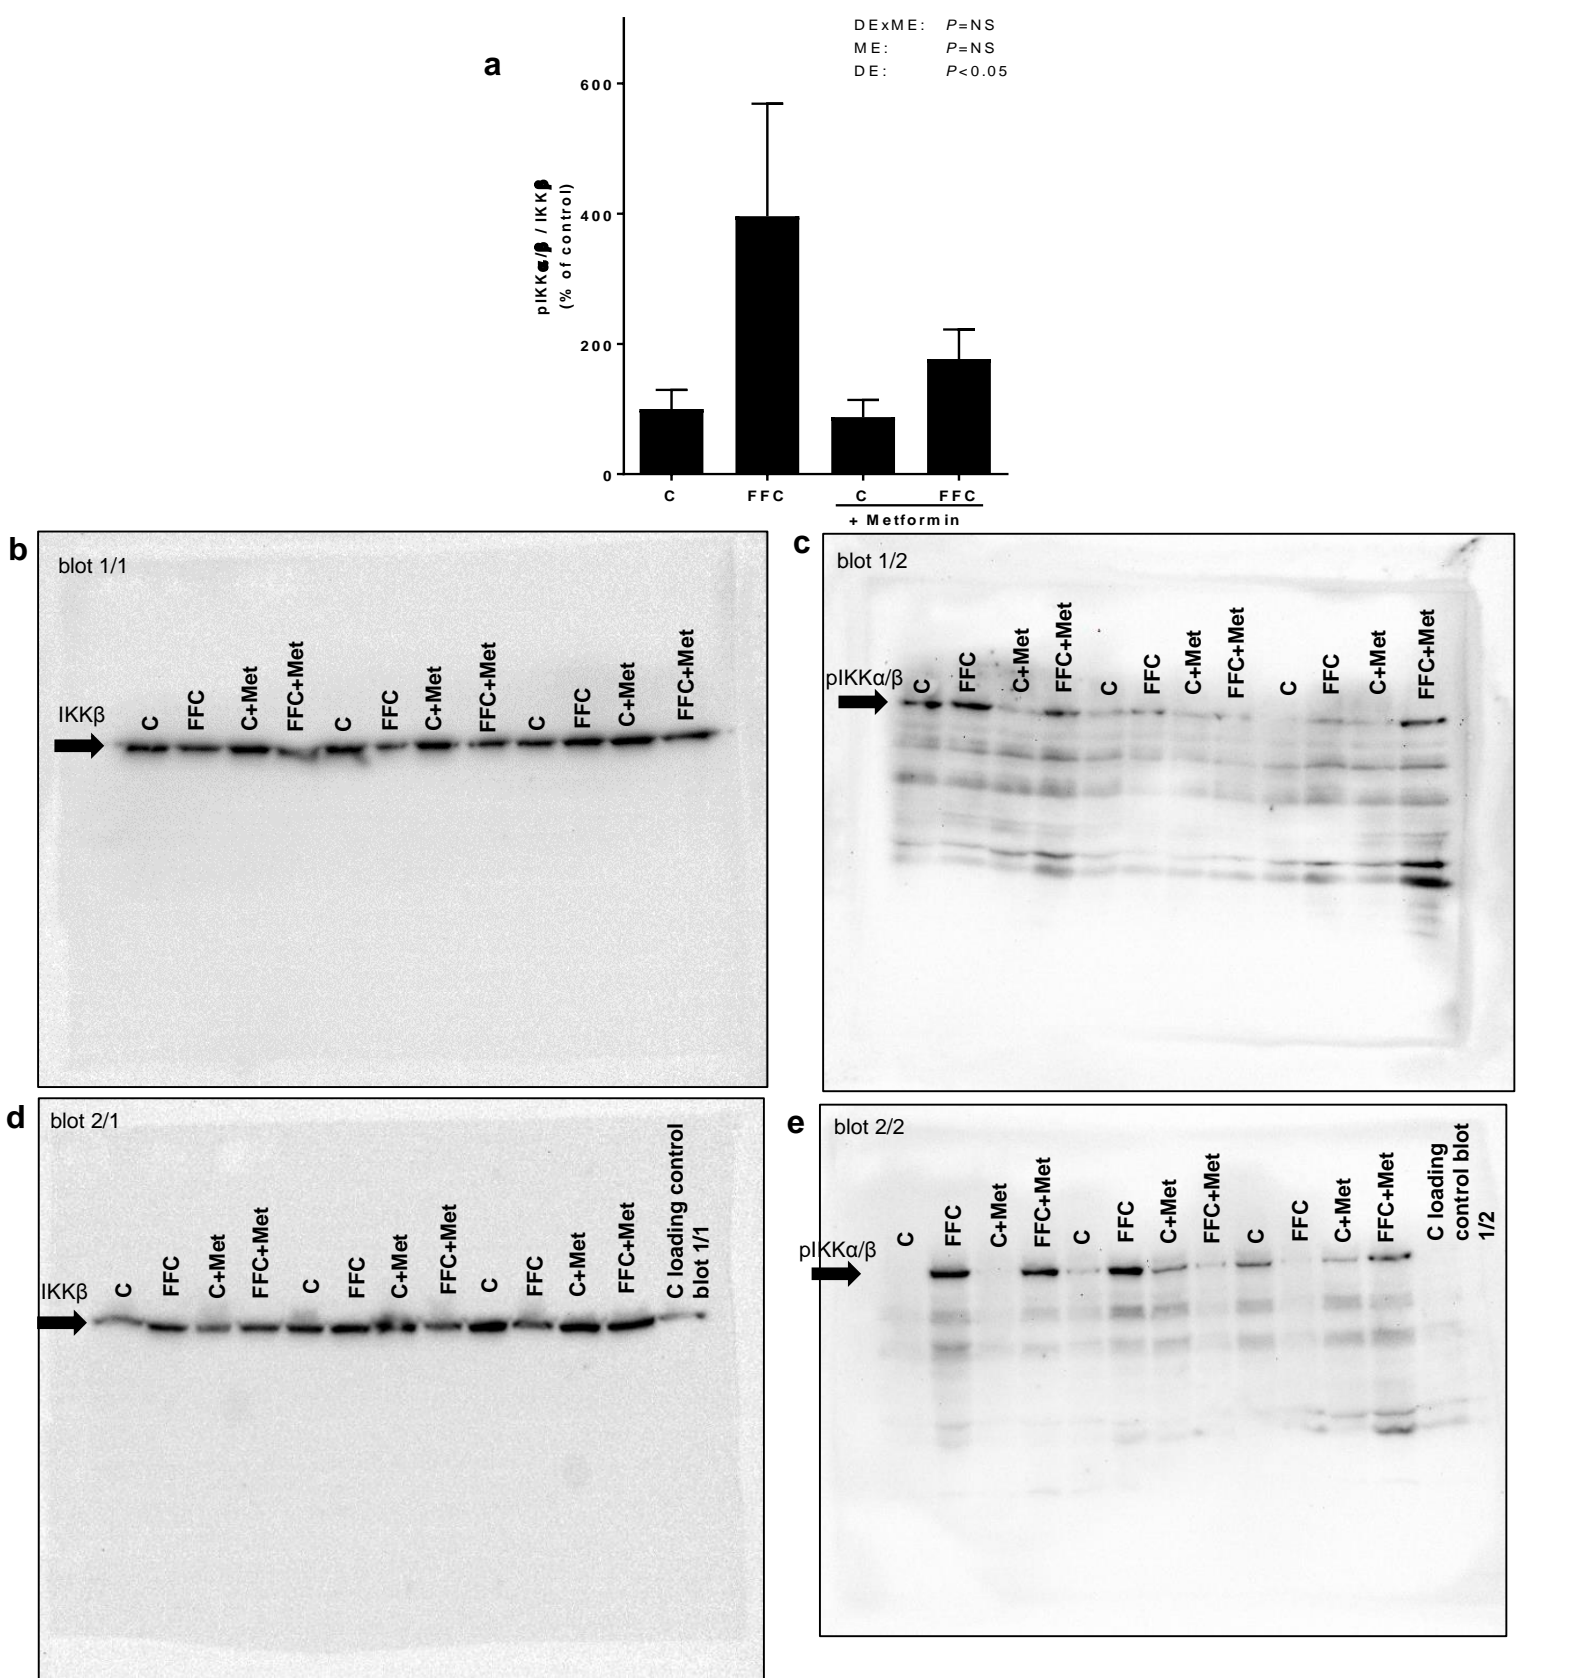

**Supplementary Figure S2: Effect of a long-term feeding (6 weeks) of a FFC or control diet  $\pm$  metformin on phosphorylation status of inhibitor of nuclear factor kappa-B kinase subunit  $\alpha$  and  $\beta$  (pIKK $\alpha/\beta$ ) in liver tissue.** (a) Densitometric analysis of pIKK $\alpha/\beta$  and IKK $\beta$  Western blot and full length blot of (b,d) IKK $\beta$  and (c,e) pIKK $\alpha/\beta$ ;  $n=5-6$ ; samples derive from the same experiment and blots were processed in parallel. Data presented as means  $\pm$  standard error of means. C: control diet; C+Met: control diet and oral treatment with metformin (300 mg/kg BW/day); DE: diet effect; DExME: interaction between diet and metformin; FFC: fat-, fructose- and cholesterol-rich diet; FFC+Met: fat-, fructose- and cholesterol-rich diet and oral treatment with metformin (300 mg/kg BW/day); ME: metformin effect ; NS: not significant.

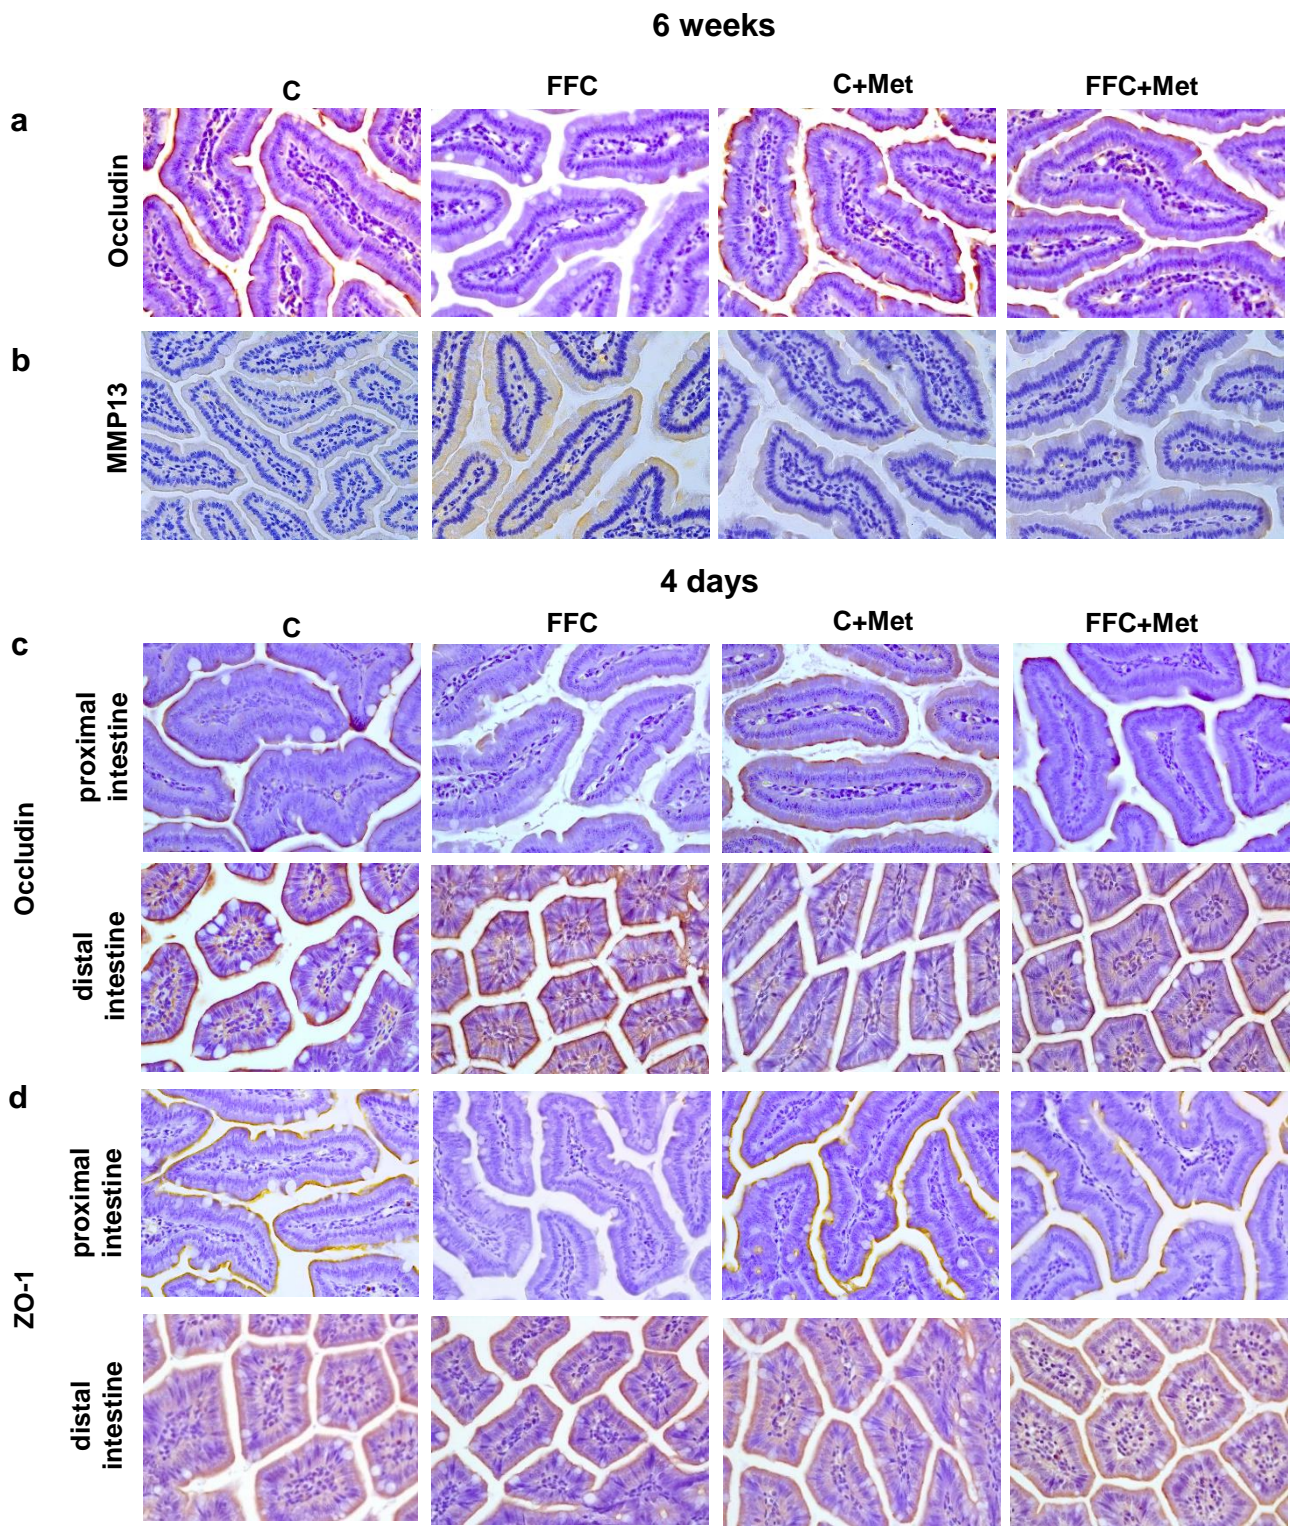

**Supplementary Figure S3: Representative pictures of immunohistochemical stainings in a long-term feeding (6 weeks) and short-term feeding (4 days) of a FFC or control diet ± metformin.** (a) Occludin (400x) and (b) MMP13 (400x) protein staining in proximal intestinal tissue in long-term trial as well as (c) occludin (400x) and (d) ZO-1 (400x) in proximal and distal intestinal tissue in short-term trial. C: control diet; C+Met: control diet and oral treatment with metformin (300 mg/kg BW/day); FFC: fat-, fructose- and cholesterol-rich diet; FFC+Met: fat-, fructose- and cholesterol-rich diet and oral treatment with metformin (300 mg/kg BW/day); MMP13: matrix-metalloproteinase 13; ZO-1: zonula occludens-1.

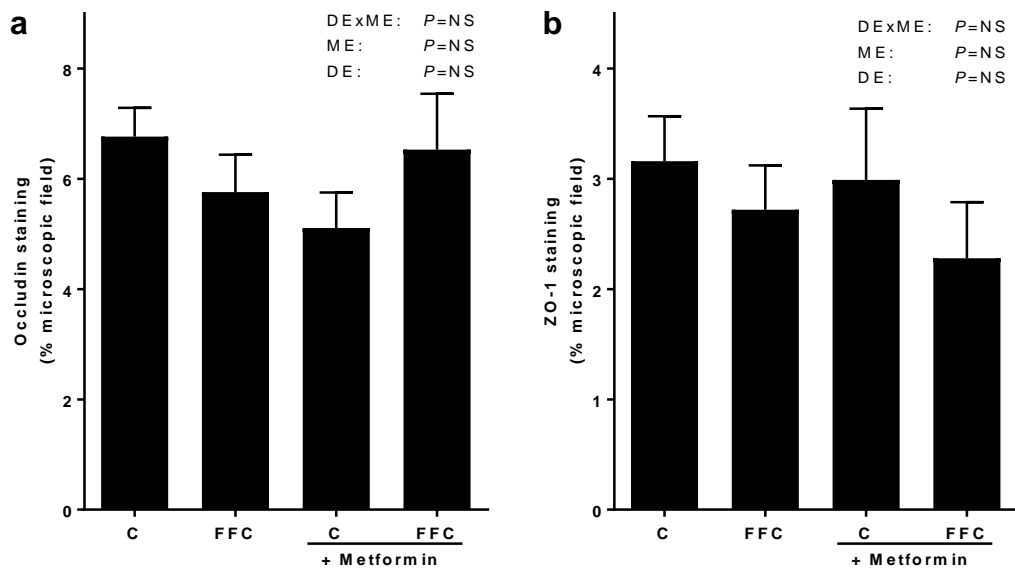

**Supplementary Figure S4: Effect of a short-term feeding (4 days) of a FFC or control diet  $\pm$  metformin on tight junction proteins in distal small intestine.** Densitometric analysis of (a) occludin and (b) ZO-1 protein staining in tissue of distal small intestine;  $n=7-8$ . Data presented as means  $\pm$  standard error of means. C: control diet; C+Met: control diet and oral treatment with metformin (300 mg/kg BW/day); DE: diet effect; DExME: interaction between diet and metformin; FFC: fat-, fructose- and cholesterol-rich diet; FFC+Met: fat-, fructose- and cholesterol-rich diet and oral treatment with metformin (300 mg/kg BW/day); ME: metformin effect ; NS: not significant; ZO-1: zonula occludens-1.



**a**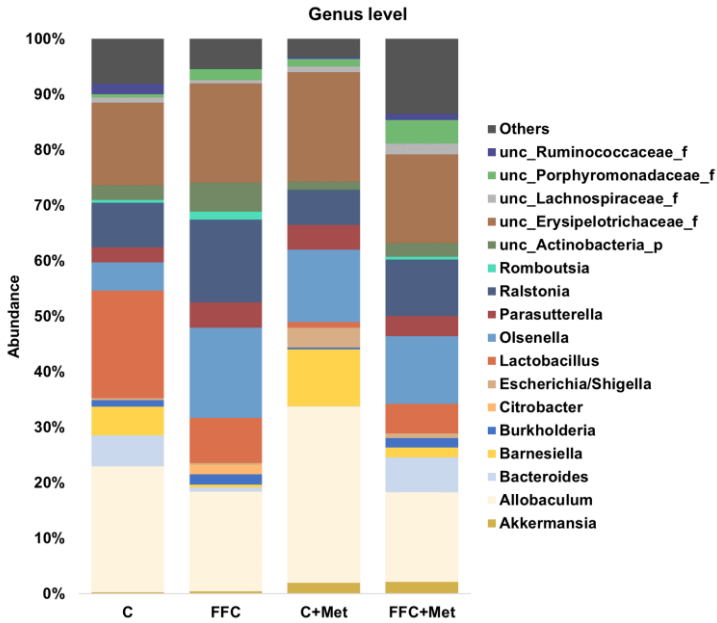**b**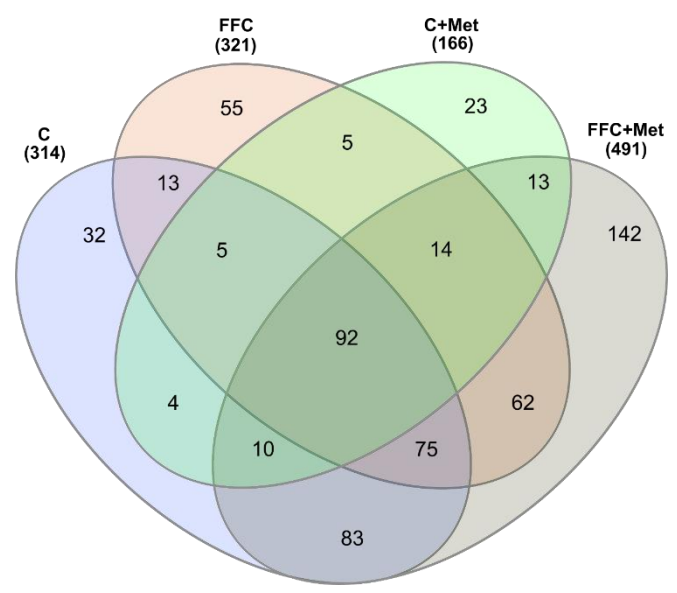

**Supplementary Figure S5: Effect of a short-term feeding (4 days) of a FFC or control diet ± metformin on microbial community in small intestine.** (a) At genus level. (b) Venn diagram with OTUs present in the samples of each diet; n=4-6. C: control diet; C+Met: control diet and oral treatment with metformin (300 mg/kg BW/day); FFC: fat-, fructose- and cholesterol-rich diet; FFC+Met: fat-, fructose- and cholesterol-rich diet and oral treatment with metformin (300 mg/kg BW/day); unc: unclassified.

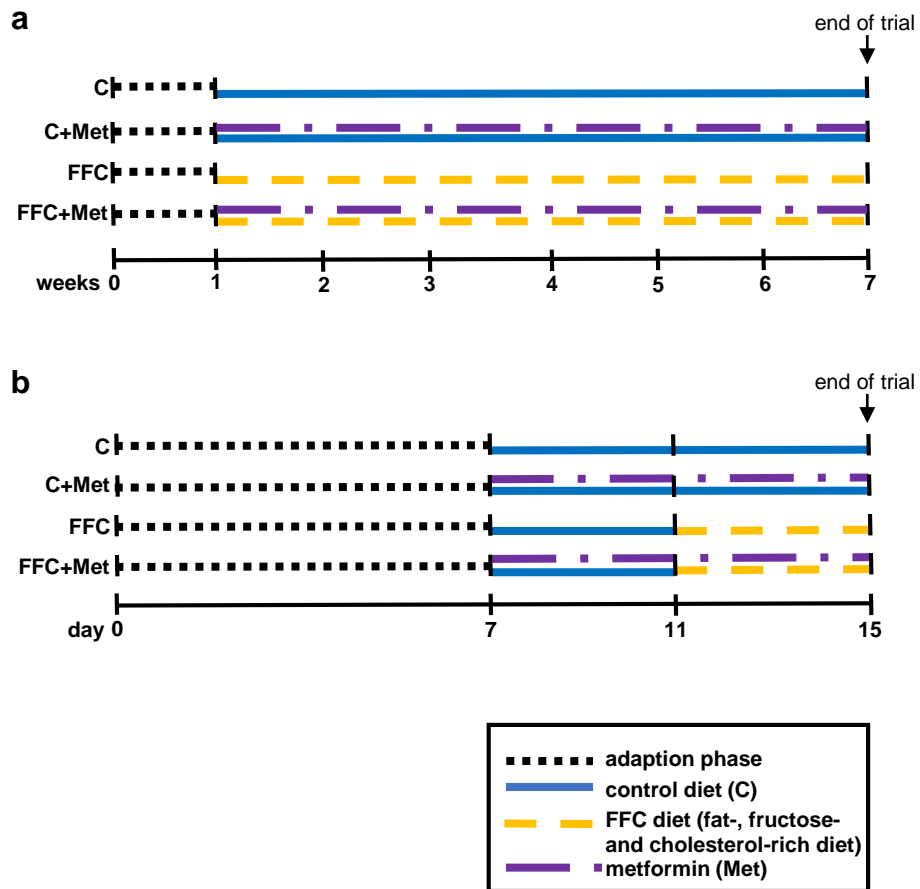

**Supplementary Figure S6: Summary of study design.** (a) Chronic feeding trial over 6 weeks and (b) short-term feeding trial fed the FFC or control diet over 4 days  $\pm$  metformin. C: control diet; C+Met: control diet and oral treatment with metformin (300 mg/kg BW/day); FFC: fat-, fructose- and cholesterol-rich diet; FFC+Metformin: fat-, fructose- and cholesterol-rich diet and oral treatment with metformin (300 mg/kg BW/day).
